# Supplementary material for: Effects of Adenotonsillectomy on Vocal Function
Source: MDPI journal article supplement (doi:10.3390/jpm13061002), 2023-06-15
Supplement: s1 [file s1]

Investigation protocol

Name and surname: \_\_\_\_\_  
number: \_\_\_\_\_

Phone

Date of birth: \_\_\_\_/\_\_\_\_/\_\_\_\_

Age: \_\_\_\_\_

Gender: ☐ M

☐ F

**Speech evaluation:**

Reported respiratory mode: ☐ Oral ☐ Nasal ☐ Mix

Reported respiratory difficulties:

- Allergies: ☐ Yes ☐ No

- Nocturnal snoring: ☐ Present ☐ Absent

- Others: \_\_\_\_\_

Oral posture: ☐ Closed ☐ Semi-closed ☐ Open

Subjective symptoms: \_\_\_\_\_

Objective symptoms

**Phonics chart**

Pitch level:

Elevated

Regular

Reduced

Inconsistent

Vocal Intensity:

Elevated

Regular

Reduced

Inconsistent

Vocal timbre:

Hoarse

Personal (Specific to the subject)

Veiled

Inconsistent

Phonetic attack:

Hard

Correct

Delayed

Inconsistent

Vocal hold:

Regular

Reduced

Phonation duration:

Regular

Reduced

Respiratory framework:

Thoracic-apical

Costo-diaphragmatic

Mix

Closed nasality: ☐ Present ☐ Absent

- Phonetic balance:

|   |   |   |   |   |
|---|---|---|---|---|
| i | e | a | o | u |
|   | ε |   | . |   |

|   |   |   |   |    |    |   |   |   |
|---|---|---|---|----|----|---|---|---|
| p | b | f | v | ts | dz | m | l | r |
| t | d | s | z | tʃ | dʒ | ɱ | ʎ |   |
| k | g | ʃ |   |    |    | n |   |   |
|   |   |   |   |    |    | ɳ |   |   |
|   |   |   |   |    |    | ɲ |   |   |

On repetition

Stable phonemes:

Occasional phonemes:

Absent phonemes:

System simplifications:

Structure simplifications:
